# Supplementary material for: Transcontinental Phylogeography of the Daphnia pulex Species Complex
Source: PubMed Central journal article supplement (PMC3463573; doi:10.1371/journal.pone.0046620), 2012-10-03

**Figure S2. Collection sites for lineages of the *Daphnia pulex* species complex included in this study, excluding panarctic *D. pulex*.**

Colors are used to indicate lineages as follows:

black = European *D. pulex*

orange = European *D. pulicaria*

green = eastern *D. pulicaria*

magenta = western *D. pulicaria*

light blue = polar *D. pulicaria*

brown = *D. middendorffiana*

dark purple = *D. tenebrosa*

light purple = S. American *D. pulicaria* A

pink = S. American *D. pulicaria* B

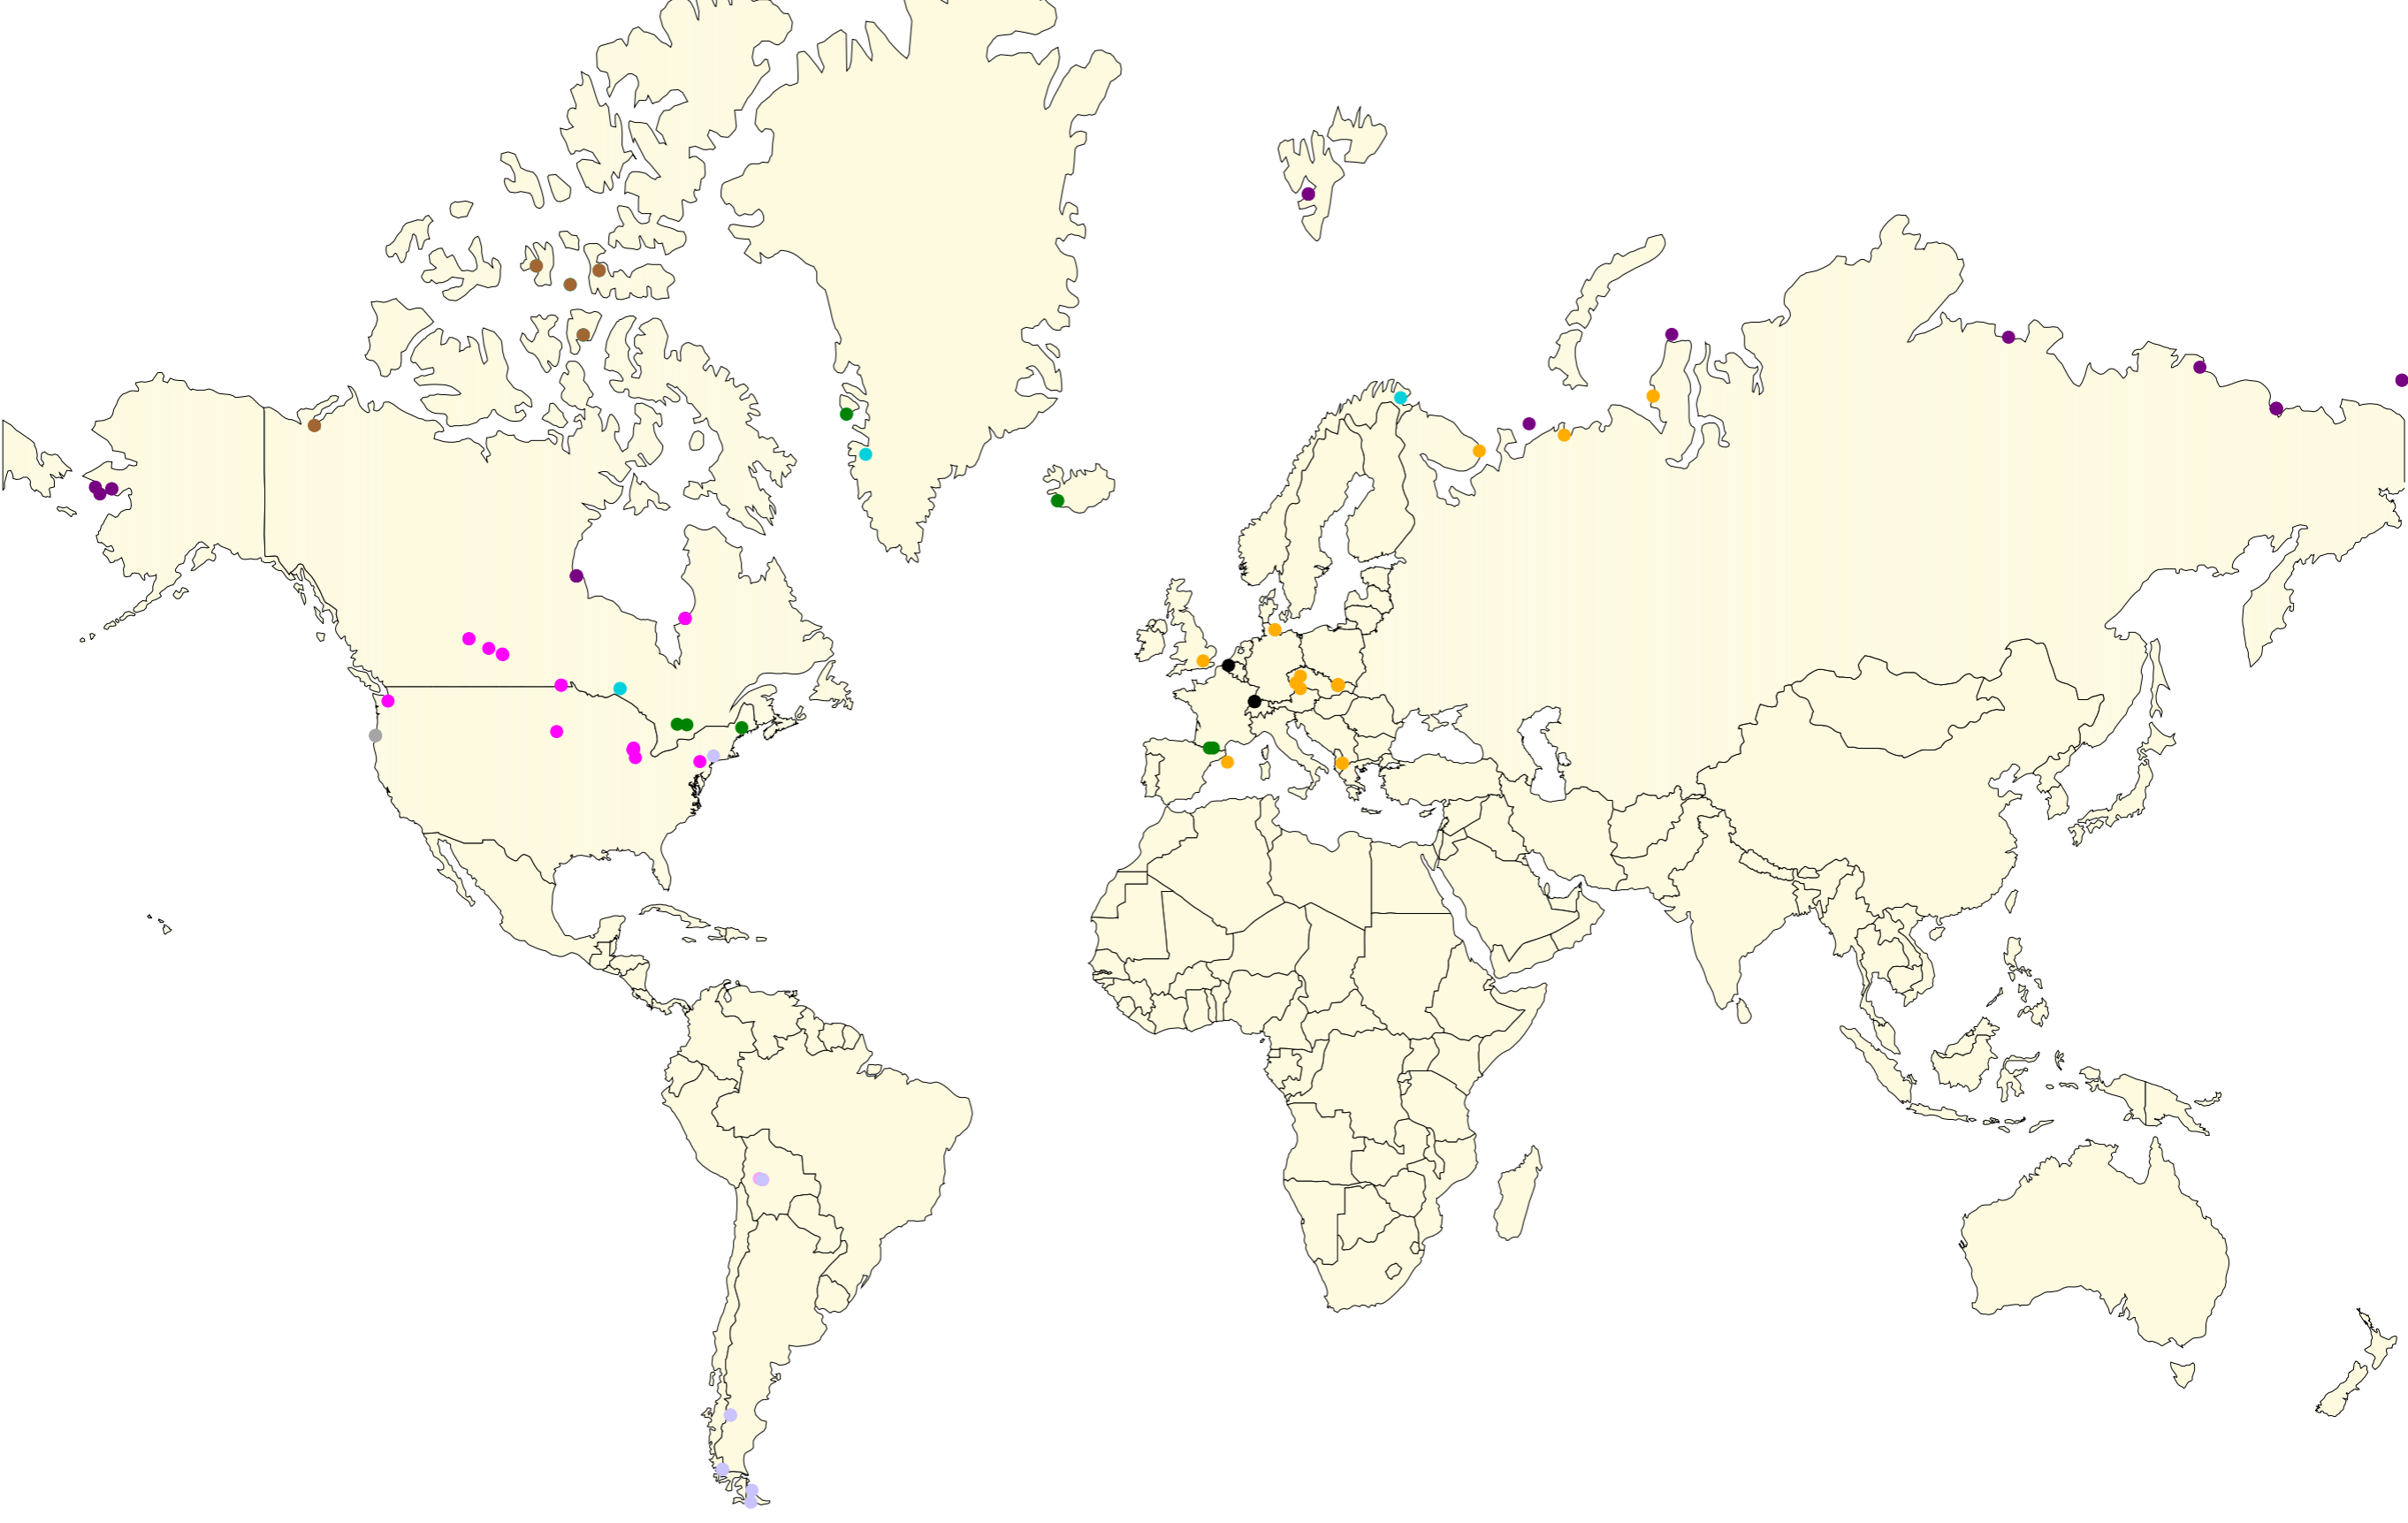

Supplement: pone.0046620.s002.pdf [file pone.0046620.s002.pdf]
